# Supplementary material for: Glycolysis regulates the expansion of myeloid-derived suppressor cells in tumor-bearing hosts through prevention of ROS-mediated apoptosis
Source: PubMed Central journal article supplement (PMC5520713; doi:10.1038/cddis.2017.192), 2017-05-11
Supplement: cddis2017192x1.pdf [file cddis2017192x1.pdf]

| Target  | Primer | Sequence 5' -> 3'       | Amplification length (bp) | Annealing temp (°C) |
|---------|--------|-------------------------|---------------------------|---------------------|
| betaAct | FW     | AGAGGGAAATCGTGCGTGAC    | 151                       | 60                  |
|         | RV     | CAATAGTGACCTGGCCGT      |                           |                     |
| Arg1    | FW     | CTCCAAGCCAAAGTCCTTAGAG  | 185                       | 60                  |
|         | RV     | AGGAGCTGTCATTAGGGACATC  |                           |                     |
| iNOS    | FW     | CTGTGTGCCTGGAGGTTCTG    | 180                       | 60                  |
|         | RV     | CCAATCTCTGCCTATCCGTCTC  |                           |                     |
| PD-L1   | FW     | GCTCCAAAGGACTTGTACGTG   | 238                       | 60                  |
|         | RV     | TGATCTGAAGGGCAGCATTTC   |                           |                     |
| PD-L2   | FW     | CTGCCGATACTGAACCTGAGC   | 126                       | 61                  |
|         | RV     | GCGGTCAAATCGCACTCC      |                           |                     |
| Glut1   | FW     | CAGTTCGGCTATAACACTGGTG  | 156                       | 61                  |
|         | RV     | GCCCCGACAGAGAAGATG      |                           |                     |
| Hk1     | FW     | CGGAATGGGAGCCTTTGG      | 269                       | 61                  |
|         | RV     | GCCTTCCTTATCCGTTTCAATGG |                           |                     |
| Hk2     | FW     | TGATCGCCTGCTTATTCACGG   | 112                       | 61                  |
|         | RV     | AACCGCTAGAAATCTCCAGA    |                           |                     |
| Pfk1    | FW     | CGACCGAATCCTGAGTAGCA    | 186                       | 60                  |
|         | RV     | GCCTCGTCAAACCTCTCCTC    |                           |                     |
| Pfkp    | FW     | AGTGTCTGGCGTCTCTACCT    | 151                       | 60                  |
|         | RV     | CAGCAGCATTCATGCCTTGG    |                           |                     |
| AldoA   | FW     | CGTGTGAATCCCTGCATTGG    | 180                       | 61                  |
|         | RV     | CAGCCCCTGGGTAGTTGTC     |                           |                     |
| Gapdh   | FW     | GCAGTGGCAAAGTGGAGATT    | 249                       | 60                  |
|         | RV     | TCTCCATGGTGGTGAAGACA    |                           |                     |
| Pgam1   | FW     | GTTGCCGAGATGCTGGCTATGA  | 102                       | 60                  |
|         | RV     | CACATCTGGTCAATGGCATCC   |                           |                     |
| Eno1    | FW     | TGCGTCCACTGGCATCTAC     | 118                       | 61                  |
|         | RV     | CAGAGCAGGCGCAATAGTTTTA  |                           |                     |
| Eno2    | FW     | GTCCCTGGCCGTGTGTAAG     | 200                       | 61                  |
|         | RV     | CATCCCGAAAGCTCTCAGC     |                           |                     |
| Pkm2    | FW     | GCCGCTGGACATTGACTC      | 145                       | 61                  |
|         | RV     | CCATGAGAGAAATTCAGCCGAG  |                           |                     |
| Ldha    | FW     | TGTCTCCAGCAAAGACTACTGT  | 155                       | 60                  |
|         | RV     | GACTGTACTTGACAATGTTGGGA |                           |                     |

**Supplementary table 1** Primer sequences used in quantitative real-time PCR.

### Supplementary figure 1

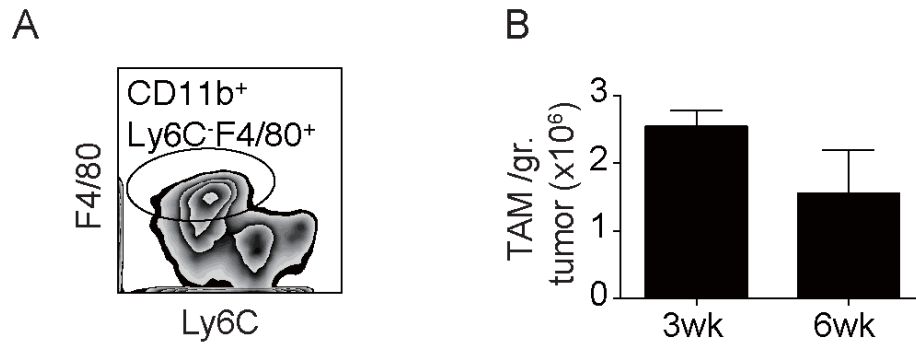

**Supplementary figure 1 (A)** A representative flow cytometric zebra plot (left) gating on total CD11b<sup>+</sup> population isolated from tumor site showing the F4/80 and Ly6C expression on the CD11b<sup>+</sup> cells and **(B)** quantification of cell number of tumor-associated macrophages (TAM, right) (CD11b<sup>+</sup>F4/80<sup>+</sup>Ly6C<sup>-</sup> population) in the tumor sites at indicated time points after tumor inoculation.

**Supplementary figure 2**

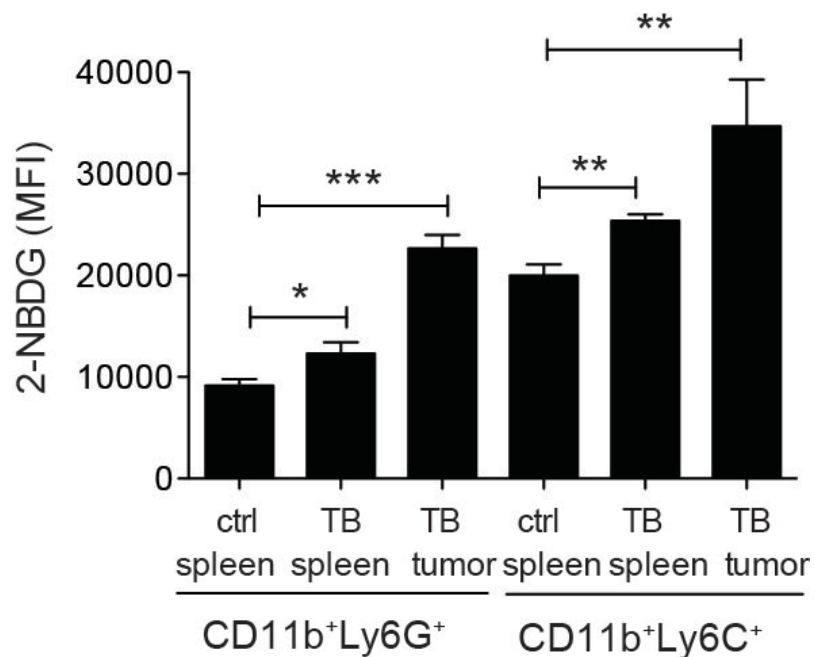

**Supplementary figure 2** Glucose uptake of myeloid cells from the spleen of normal control (ctrl) mice and of MDSCs from the spleen and the tumor site of 4T1 tumor-bearing (TB) Balb/c mice. Splenocytes and tumor-associated leukocytes were cultured in glucose-free medium for 1 hour and pulsed with a fluorescent glucose analog - 2-NBDG (2-(N-(7-Nitrobenz-2-oxa-1,3-diazol-4-yl)Amino)-2-Deoxyglucose) at the concentration of 200  $\mu$ M for another 1 hour. CD11b<sup>+</sup>Ly6G<sup>+</sup> (gMDSCs, neutrophils) and CD11b<sup>+</sup>Ly6C<sup>+</sup> (mMDSCs, monocytes) live cells were analyzed for their uptake of 2-NBDG by flow cytometry. \* $P < 0.05$ , \*\* $P < 0.01$ , \*\*\* $P < 0.001$  (unpaired Student's *t*-test). (error bars, s.d.)

### Supplementary figure 3

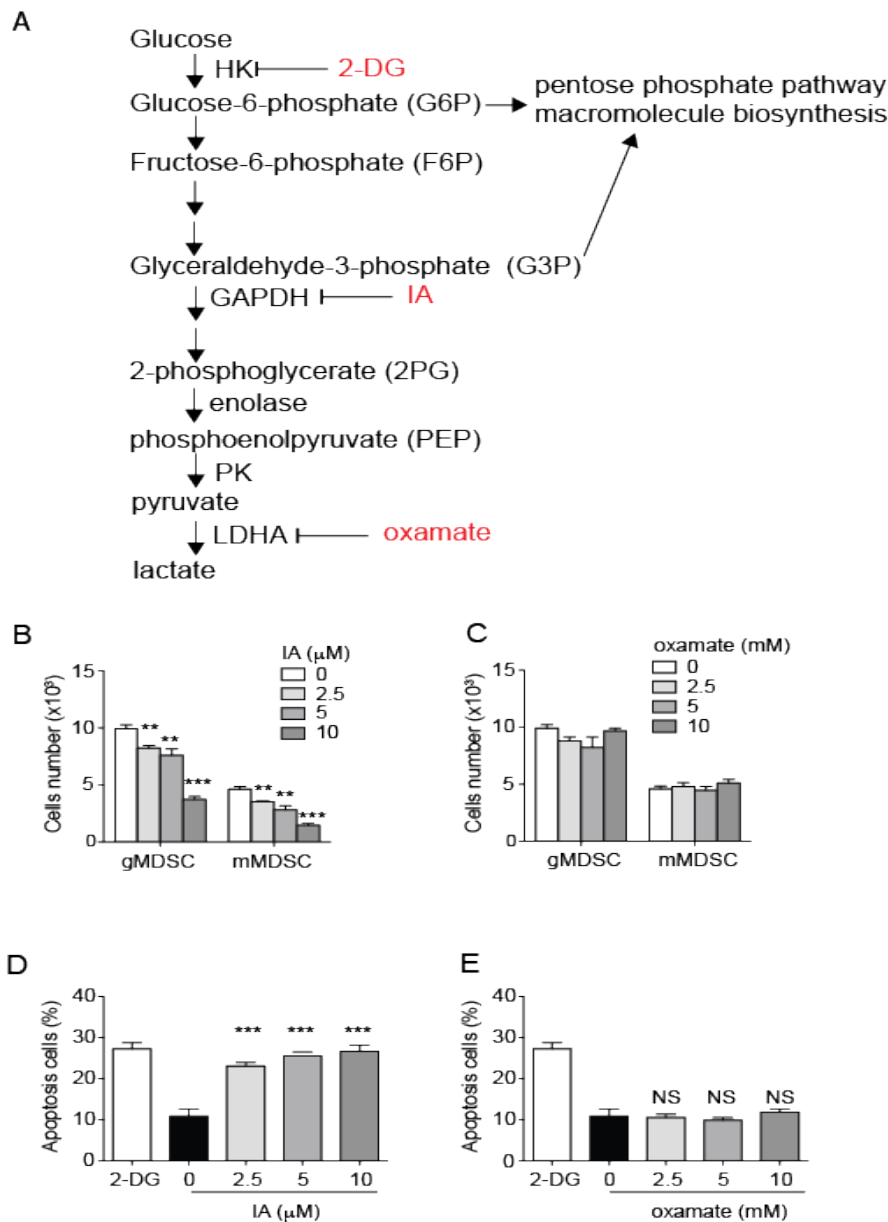

**Supplementary figure 3** GAPDH inhibitor-IA but not LDHA inhibitor-oxamate also induced apoptosis of MDSCs. **(A)** Metabolites, enzymes and inhibitors (red) involved in aerobic glycolysis **(B)** Cell numbers of gMDSCs and mMDSCs recovered from the MDSC induction culture 3 days after induction using 20 ng/ml of GM-CSF in the presence or absence of indicated concentration of IA in 96-well plates. **(C)** Cell numbers of gMDSCs and mMDSCs recovered from the MDSC induction culture 3 days after induction using 20 ng/ml of GM-CSF in the presence or absence of indicated concentration of oxamate in 96-well plates. **(D)**

Percentage of PI-Annexin V<sup>+</sup> early apoptotic cells among CD11b<sup>+</sup>Gr-1<sup>+</sup> GM-CSF-induced MDSCs treated with IA for 8 hours. **(E)** Percentage of PI-Annexin V<sup>+</sup> early apoptotic cells among CD11b<sup>+</sup>Gr-1<sup>+</sup> GM-CSF-induced MDSCs treated with oxamate for 8 hours. NS, not significant, \* $P < 0.05$ , \*\* $P < 0.01$ , \*\*\* $P < 0.001$  (unpaired Student's *t*-test). **(B, C, D, E;** error bars, s.d.)
